# Supplementary material
Source: PubMed Central journal article supplement (PMC2655317)
Supplement: NIHMS91480-supplement-1_si_001.pdf [file NIHMS91480-supplement-1_si_001.pdf]

Supplementary Table 1. All Pairs of Expression Ratios (S2:C0) Measured *via* iTRAQ or SILAC

| Protein Name                                                                | S2:C0 Ratio      |                  | Average Ratio |
|-----------------------------------------------------------------------------|------------------|------------------|---------------|
|                                                                             | <i>via</i> iTRAQ | <i>via</i> SILAC |               |
| Uridine 5'-monophosphate synthase                                           | 0.78             | 0.73             | 0.75          |
| Exportin-2                                                                  | 0.82             | 0.90             | 0.86          |
| Translationally-controlled tumor protein                                    | 0.83             | 0.85             | 0.84          |
| PREDICTED: similar to ribosomal protein S12                                 | 0.84             | 0.89             | 0.86          |
| Adult male testis cDNA, RIKEN full-length enriched library, clone:493058410 | 0.85             | 0.81             | 0.83          |
| Eukaryotic translation initiation factor 3 subunit 8                        | 0.86             | 0.95             | 0.90          |
| Solute carrier family 1 (Neutral amino acid transporter), member 5          | 0.86             | 0.65             | 0.76          |
| Isoform 1 of Formin-like protein 1                                          | 0.87             | 1.35             | 1.11          |
| 3906 kDa protein                                                            | 0.87             | 1.35             | 1.11          |
| Heterogeneous nuclear ribonucleoprotein L                                   | 0.87             | 0.87             | 0.87          |
| Basic leucine zipper and W2 domain-containing protein 1                     | 0.87             | 0.82             | 0.85          |
| Activated spleen cDNA, RIKEN full-length enriched library, clone:F830029A1  | 0.88             | 1.04             | 0.96          |
| PREDICTED: similar to zinc finger protein 706 isoform 3                     | 0.88             | 0.97             | 0.92          |
| CRL-1722 L5178Y-R cDNA, RIKEN full-length enriched library, clone:I73000    | 0.88             | 0.90             | 0.89          |
| DNA replication licensing factor MCM6                                       | 0.88             | 1.24             | 1.06          |
| 23 kDa protein                                                              | 0.88             | 0.77             | 0.83          |
| Histone H1.1                                                                | 0.88             | 0.75             | 0.82          |
| Calreticulin precursor                                                      | 0.88             | 0.65             | 0.76          |
| Adenylosuccinate synthetase isozyme 2                                       | 0.89             | 0.79             | 0.84          |
| Dipeptidyl-peptidase 1 precursor                                            | 0.89             | 1.04             | 0.96          |
| 10 kDa heat shock protein, mitochondrial                                    | 0.89             | 0.87             | 0.88          |
| 162 kDa protein                                                             | 0.89             | 1.00             | 0.95          |
| 60S ribosomal protein L24                                                   | 0.90             | 0.84             | 0.87          |
| ATP-dependent RNA helicase DDX18                                            | 0.90             | 0.96             | 0.93          |
| SH3 domain-binding glutamic acid-rich-like protein                          | 0.90             | 0.96             | 0.93          |
| NOD-derived CD11c +ve dendritic cells cDNA, RIKEN full-length enriched lit  | 0.90             | 1.04             | 0.97          |
| 4 days embryo whole body cDNA, RIKEN full-length enriched library, clone:ll | 0.91             | 0.77             | 0.84          |
| polypyrimidine tract binding protein 1 isoform 1                            | 0.91             | 1.06             | 0.99          |
| S-adenosylmethionine synthetase isoform type-2                              | 0.91             | 1.20             | 1.06          |
| 16 kDa protein                                                              | 0.91             | 1.09             | 1.00          |
| protein disulfide isomerase associated 3                                    | 0.91             | 0.91             | 0.91          |
| Lamina-associated polypeptide 1B                                            | 0.91             | 1.06             | 0.99          |
| 20 kDa protein                                                              | 0.91             | 1.10             | 1.01          |
| 60S acidic ribosomal protein P2                                             | 0.92             | 0.92             | 0.92          |
| diazepam binding inhibitor isoform 1                                        | 0.92             | 0.92             | 0.92          |
| PREDICTED: similar to 60S ribosomal protein L23a                            | 0.92             | 0.87             | 0.89          |
| B6-derived CD11 +ve dendritic cells cDNA, RIKEN full-length enriched librar | 0.92             | 0.95             | 0.93          |
| Glutamate dehydrogenase 1, mitochondrial precursor                          | 0.92             | 0.96             | 0.94          |
| PREDICTED: similar to ribosomal protein S10                                 | 0.92             | 0.92             | 0.92          |
| 15 kDa protein                                                              | 0.92             | 0.90             | 0.91          |
| Nucleophosmin                                                               | 0.92             | 0.87             | 0.90          |
| RNA-binding protein FUS                                                     | 0.92             | 0.81             | 0.87          |
| 17 days embryo heart cDNA, RIKEN full-length enriched library, clone:I9200  | 0.92             | 1.43             | 1.18          |

|                                                                               |      |      |      |
|-------------------------------------------------------------------------------|------|------|------|
| UDP-glucose ceramide glucosyltransferase-like 1                               | 0.92 | 0.81 | 0.87 |
| PREDICTED: similar to Serine/threonine-protein phosphatase 2A catalytic su    | 0.92 | 1.16 | 1.04 |
| Endoplasmic reticulum protein ERp29 precursor                                 | 0.93 | 1.12 | 1.02 |
| 17 days embryo kidney cDNA, RIKEN full-length enriched library, clone:I920    | 0.93 | 0.98 | 0.95 |
| Histone H1.5                                                                  | 0.93 | 0.89 | 0.91 |
| Ras-related protein Rab-1B                                                    | 0.93 | 1.13 | 1.03 |
| 14-3-3 protein eta                                                            | 0.93 | 1.09 | 1.01 |
| 10 days neonate olfactory brain cDNA, RIKEN full-length enriched library, clc | 0.93 | 1.06 | 0.99 |
| Cbx3 protein                                                                  | 0.93 | 0.95 | 0.94 |
| 40S ribosomal protein S27                                                     | 0.93 | 0.89 | 0.91 |
| Mannosyl-oligosaccharide glucosidase                                          | 0.93 | 0.83 | 0.88 |
| 78 kDa glucose-regulated protein precursor                                    | 0.93 | 0.74 | 0.83 |
| PREDICTED: similar to ribosomal protein L38                                   | 0.93 | 0.83 | 0.88 |
| 60S ribosomal protein L13                                                     | 0.94 | 1.26 | 1.10 |
| Elongation factor 1-beta                                                      | 0.94 | 1.06 | 1.00 |
| Hypoxanthine-guanine phosphoribosyltransferase                                | 0.94 | 0.94 | 0.94 |
| Nucleolar protein 1                                                           | 0.94 | 0.93 | 0.93 |
| CRL-1722 L5178Y-R cDNA, RIKEN full-length enriched library, clone:I73007      | 0.94 | 0.79 | 0.86 |
| protective protein for beta-galactosidase isoform a                           | 0.94 | 1.27 | 1.11 |
| 60S ribosomal protein L5                                                      | 0.94 | 0.87 | 0.91 |
| Isoform 2 of Heterogeneous nuclear ribonucleoprotein M                        | 0.94 | 1.06 | 1.00 |
| DEAD (Asp-Glu-Ala-Asp) box polypeptide 21                                     | 0.94 | 1.32 | 1.13 |
| Valyl-tRNA synthetase                                                         | 0.94 | 1.14 | 1.04 |
| Tubulin beta-5 chain                                                          | 0.94 | 1.04 | 0.99 |
| 40S ribosomal protein S30                                                     | 0.94 | 1.01 | 0.97 |
| 60 kDa heat shock protein, mitochondrial precursor                            | 0.94 | 1.00 | 0.97 |
| Prohibitin-2                                                                  | 0.94 | 1.00 | 0.97 |
| 19 kDa protein                                                                | 0.94 | 0.94 | 0.94 |
| PREDICTED: similar to 40S ribosomal protein S7 (S8) isoform 1                 | 0.94 | 0.93 | 0.94 |
| Leucine-rich repeat-containing protein 59                                     | 0.94 | 0.91 | 0.93 |
| Citrate synthase, mitochondrial precursor                                     | 0.94 | 0.90 | 0.92 |
| UDP glycosyltransferase 1 family polypeptide A10                              | 0.94 | 0.62 | 0.78 |
| PREDICTED: similar to 60S ribosomal protein L6                                | 0.95 | 1.32 | 1.13 |
| 60S ribosomal protein L7                                                      | 0.95 | 1.20 | 1.07 |
| 40S ribosomal protein S4, X isoform                                           | 0.95 | 0.99 | 0.97 |
| Endoplasmin precursor                                                         | 0.95 | 0.96 | 0.95 |
| protein disulfide isomerase associated 4                                      | 0.95 | 0.94 | 0.94 |
| Proliferating cell nuclear antigen                                            | 0.95 | 1.06 | 1.00 |
| 40S ribosomal protein S19                                                     | 0.95 | 1.05 | 1.00 |
| 40S ribosomal protein S11                                                     | 0.95 | 0.83 | 0.89 |
| PREDICTED: similar to ribosomal protein L19                                   | 0.95 | 0.73 | 0.84 |
| PREDICTED: similar to 40S ribosomal protein S17                               | 0.95 | 1.39 | 1.17 |
| Ran-specific GTPase-activating protein (Fragment)                             | 0.95 | 1.18 | 1.07 |
| 40S ribosomal protein S9                                                      | 0.95 | 1.11 | 1.03 |
| nucleolar and coiled-body phosphoprotein 1 isoform B                          | 0.95 | 0.93 | 0.94 |
| ATP-binding cassette sub-family E member 1                                    | 0.95 | 0.86 | 0.91 |
| Leucine-rich repeat-containing protein 25 precursor                           | 0.95 | 0.81 | 0.88 |

|                                                                                |      |      |      |
|--------------------------------------------------------------------------------|------|------|------|
| 13 kDa protein                                                                 | 0.95 | 0.90 | 0.93 |
| 26S proteasome non-ATPase regulatory subunit 12                                | 0.95 | 0.88 | 0.92 |
| Isoform 2 of Acidic leucine-rich nuclear phosphoprotein 32 family member E     | 0.96 | 1.27 | 1.11 |
| 40S ribosomal protein S20                                                      | 0.96 | 1.19 | 1.07 |
| PREDICTED: similar to 40S ribosomal protein S2 isoform 3                       | 0.96 | 1.09 | 1.02 |
| 26S proteasome non-ATPase regulatory subunit 6                                 | 0.96 | 1.06 | 1.01 |
| Osteoclast-like cell cDNA, RIKEN full-length enriched library, clone:1420039N  | 0.96 | 1.00 | 0.98 |
| Arpc1b protein                                                                 | 0.96 | 0.92 | 0.94 |
| 40S ribosomal protein S15a                                                     | 0.96 | 0.75 | 0.85 |
| Uba52 protein                                                                  | 0.96 | 0.74 | 0.85 |
| Nucleolar protein Nop56                                                        | 0.96 | 0.96 | 0.96 |
| 40S ribosomal protein S5                                                       | 0.96 | 0.96 | 0.96 |
| 60S acidic ribosomal protein P1                                                | 0.96 | 0.84 | 0.90 |
| THO complex 4                                                                  | 0.96 | 0.56 | 0.76 |
| Ras-GTPase-activating protein-binding protein 1                                | 0.96 | 1.07 | 1.01 |
| Leucocyte common antigen (Fragment)                                            | 0.96 | 1.06 | 1.01 |
| 23 kDa protein                                                                 | 0.96 | 1.04 | 1.00 |
| 40S ribosomal protein S25                                                      | 0.96 | 0.99 | 0.97 |
| Histidine triad nucleotide-binding protein 1                                   | 0.96 | 0.95 | 0.95 |
| Eukaryotic initiation factor 4A-I                                              | 0.96 | 0.94 | 0.95 |
| Hsc70-interacting protein                                                      | 0.96 | 0.94 | 0.95 |
| PREDICTED: similar to heterogeneous nuclear ribonucleoprotein A3               | 0.96 | 0.94 | 0.95 |
| ATP synthase coupling factor 6, mitochondrial precursor                        | 0.96 | 0.94 | 0.95 |
| In vitro fertilized eggs cDNA, RIKEN full-length enriched library, clone:74204 | 0.96 | 0.93 | 0.94 |
| PREDICTED: high mobility group box 2                                           | 0.96 | 0.92 | 0.94 |
| Isoform 1 of Transcription factor BTF3                                         | 0.96 | 0.91 | 0.93 |
| 22 kDa protein                                                                 | 0.96 | 0.90 | 0.93 |
| PREDICTED: similar to NonO/p54nrb homolog                                      | 0.96 | 0.88 | 0.92 |
| Staphylococcal nuclease domain-containing protein 1                            | 0.96 | 0.84 | 0.90 |
| peptidylprolyl isomerase B                                                     | 0.96 | 0.75 | 0.85 |
| Guanine nucleotide-binding protein subunit beta 2-like 1                       | 0.96 | 0.60 | 0.78 |
| 50 kDa protein                                                                 | 0.96 | 1.25 | 1.11 |
| 29 kDa protein                                                                 | 0.96 | 0.93 | 0.95 |
| PREDICTED: similar to ribosomal protein S13                                    | 0.96 | 1.18 | 1.07 |
| Protein S100-A4                                                                | 0.97 | 1.30 | 1.13 |
| Stress-induced-phosphoprotein 1                                                | 0.97 | 1.24 | 1.10 |
| RNA binding motif protein, X chromosome retrogene                              | 0.97 | 1.04 | 1.00 |
| Aconitate hydratase, mitochondrial precursor                                   | 0.97 | 0.96 | 0.96 |
| Nucleolin                                                                      | 0.97 | 0.95 | 0.96 |
| 40S ribosomal protein S3                                                       | 0.97 | 0.94 | 0.95 |
| Isoform I of Macrophage scavenger receptor types I and II                      | 0.97 | 0.93 | 0.95 |
| RCB-0035 WEHI-3 cDNA, RIKEN full-length enriched library, clone:G430091        | 0.97 | 0.79 | 0.88 |
| Adenylyl cyclase-associated protein 1                                          | 0.97 | 1.35 | 1.16 |
| 60S ribosomal protein L10a                                                     | 0.97 | 0.91 | 0.94 |
| 40S ribosomal protein S21                                                      | 0.97 | 0.85 | 0.91 |
| Thioredoxin domain-containing protein 1 precursor                              | 0.97 | 1.06 | 1.02 |
| Vigilin                                                                        | 0.97 | 1.06 | 1.02 |

|                                                                              |      |      |      |
|------------------------------------------------------------------------------|------|------|------|
| PREDICTED: similar to 60S ribosomal protein L18                              | 0.97 | 1.04 | 1.00 |
| 40S ribosomal protein S17                                                    | 0.97 | 1.02 | 0.99 |
| Nucleoside diphosphate kinase B                                              | 0.97 | 1.00 | 0.99 |
| Serine hydroxymethyl transferase 2                                           | 0.97 | 0.98 | 0.97 |
| FK506-binding protein 4                                                      | 0.97 | 0.92 | 0.94 |
| Sorting nexin-2                                                              | 0.97 | 0.90 | 0.94 |
| Heterogeneous nuclear ribonucleoprotein A2/B1/B0                             | 0.97 | 0.90 | 0.93 |
| Elongation factor 2                                                          | 0.97 | 0.86 | 0.91 |
| Nicotinamide phosphoribosyltransferase                                       | 0.97 | 0.84 | 0.90 |
| Aspartate aminotransferase, mitochondrial precursor                          | 0.97 | 0.68 | 0.83 |
| Eukaryotic translation initiation factor 4B                                  | 0.97 | 0.62 | 0.80 |
| 30 kDa protein                                                               | 0.97 | 0.94 | 0.96 |
| ATP synthase B chain, mitochondrial precursor                                | 0.97 | 0.89 | 0.93 |
| Fatty acid synthase                                                          | 0.98 | 1.39 | 1.18 |
| 60S ribosomal protein L8                                                     | 0.98 | 1.17 | 1.07 |
| Elongation factor 1-alpha 1                                                  | 0.98 | 1.07 | 1.02 |
| 18 kDa protein                                                               | 0.98 | 0.99 | 0.98 |
| Isoform 2 of Glucosidase 2 subunit beta precursor                            | 0.98 | 0.97 | 0.97 |
| Aldehyde dehydrogenase, mitochondrial precursor                              | 0.98 | 0.75 | 0.86 |
| PREDICTED: similar to 40S ribosomal protein S3a                              | 0.98 | 1.17 | 1.07 |
| 14 kDa protein                                                               | 0.98 | 0.93 | 0.96 |
| Nuclear migration protein nudC                                               | 0.98 | 1.30 | 1.14 |
| PREDICTED: similar to ribosomal protein S24                                  | 0.98 | 1.19 | 1.09 |
| Actin-related protein 2/3 complex subunit 4                                  | 0.98 | 1.17 | 1.08 |
| Superoxide dismutase                                                         | 0.98 | 1.07 | 1.03 |
| PREDICTED: similar to Ribosome-binding protein 1                             | 0.98 | 1.03 | 1.01 |
| Hist1h4h protein (Fragment)                                                  | 0.98 | 1.02 | 1.00 |
| Sodium/potassium-transporting ATPase subunit beta-3                          | 0.98 | 1.02 | 1.00 |
| Probable ATP-dependent RNA helicase DDX5                                     | 0.98 | 1.01 | 1.00 |
| eukaryotic translation elongation factor 1 delta isoform a                   | 0.98 | 1.01 | 1.00 |
| 18 kDa protein                                                               | 0.98 | 1.00 | 0.99 |
| 8 cells embryo 8 cells cDNA, RIKEN full-length enriched library, clone:E860C | 0.98 | 0.99 | 0.98 |
| Adult male hippocampus cDNA, RIKEN full-length enriched library, clone:C6    | 0.98 | 0.98 | 0.98 |
| PREDICTED: similar to EF hand domain containing 2 isoform 2                  | 0.98 | 0.96 | 0.97 |
| Cathepsin Z                                                                  | 0.98 | 0.95 | 0.97 |
| Unc-112-related protein 2                                                    | 0.98 | 0.95 | 0.96 |
| Protein S100-A6                                                              | 0.98 | 0.91 | 0.94 |
| Malate dehydrogenase 2, NAD                                                  | 0.98 | 0.89 | 0.94 |
| Acetyl-CoA acetyltransferase, mitochondrial precursor                        | 0.98 | 0.78 | 0.88 |
| Lactoylglutathione lyase                                                     | 0.99 | 1.13 | 1.06 |
| 60S ribosomal protein L14                                                    | 0.99 | 1.04 | 1.01 |
| 25 kDa protein                                                               | 0.99 | 1.03 | 1.01 |
| PREDICTED: similar to 60S ribosomal protein L12                              | 0.99 | 1.00 | 0.99 |
| Calmodulin                                                                   | 0.99 | 0.99 | 0.99 |
| ATP synthase O subunit, mitochondrial precursor                              | 0.99 | 0.97 | 0.98 |
| 12 days embryo embryonic body between diaphragm region and neck cDNA         | 0.99 | 0.93 | 0.96 |
| PREDICTED: similar to Cytochrome c, somatic                                  | 0.99 | 0.92 | 0.95 |

|                                                                               |      |      |      |
|-------------------------------------------------------------------------------|------|------|------|
| Activating signal cointegrator 1 complex subunit 3-like 1                     | 0.99 | 0.89 | 0.94 |
| Dihydropyrimidinase-related protein 2                                         | 0.99 | 0.87 | 0.93 |
| Importin alpha-2 subunit                                                      | 0.99 | 0.74 | 0.86 |
| Gag-Pol polyprotein                                                           | 0.99 | 1.32 | 1.15 |
| Eukaryotic translation initiation factor 3 subunit 3                          | 0.99 | 1.23 | 1.11 |
| Transaldolase                                                                 | 0.99 | 1.06 | 1.02 |
| Bifunctional purine biosynthesis protein PURH                                 | 0.99 | 1.02 | 1.01 |
| Osteoclast-like cell cDNA, RIKEN full-length enriched library, clone:I420010J | 0.99 | 1.01 | 1.00 |
| 40S ribosomal protein S14                                                     | 0.99 | 0.99 | 0.99 |
| Myb-binding protein 1A                                                        | 0.99 | 0.90 | 0.95 |
| 40S ribosomal protein SA                                                      | 0.99 | 0.90 | 0.94 |
| 13 kDa protein                                                                | 0.99 | 0.89 | 0.94 |
| Proteasome subunit beta type 2                                                | 0.99 | 0.85 | 0.92 |
| Nuclease sensitive element-binding protein 1                                  | 0.99 | 0.82 | 0.91 |
| Isoform 4 of Heterogeneous nuclear ribonucleoprotein D0                       | 0.99 | 0.82 | 0.90 |
| Isoform 1 of Isocitrate dehydrogenase [NADP], mitochondrial precursor         | 0.99 | 0.73 | 0.86 |
| 16 kDa protein                                                                | 0.99 | 0.95 | 0.97 |
| Tubulin alpha-4 chain                                                         | 1.00 | 1.20 | 1.10 |
| CD98 heavy chain                                                              | 1.00 | 1.08 | 1.04 |
| Nascent polypeptide-associated complex subunit alpha, muscle-specific form    | 1.00 | 1.06 | 1.03 |
| Stress-70 protein, mitochondrial precursor                                    | 1.00 | 1.01 | 1.00 |
| 49 kDa protein                                                                | 1.00 | 0.98 | 0.99 |
| Cathepsin B precursor                                                         | 1.00 | 0.93 | 0.96 |
| 14-3-3 protein zeta/delta                                                     | 1.00 | 0.90 | 0.95 |
| ATP synthase subunit beta, mitochondrial precursor                            | 1.00 | 0.89 | 0.94 |
| ADP/ATP translocase 2                                                         | 1.00 | 0.84 | 0.92 |
| Adult male hippocampus cDNA, RIKEN full-length enriched library, clone:29C    | 1.00 | 0.82 | 0.91 |
| Nuclear pore complex-associated intranuclear coiled-coil protein TPR          | 1.00 | 1.60 | 1.30 |
| Isoform 2 of Poly(rC)-binding protein 2                                       | 1.00 | 1.30 | 1.15 |
| 60S ribosomal protein L4                                                      | 1.00 | 1.26 | 1.13 |
| 60S ribosomal protein L32                                                     | 1.00 | 1.23 | 1.11 |
| Osteoclast-like cell cDNA, RIKEN full-length enriched library, clone:I420031F | 1.00 | 1.17 | 1.08 |
| Heat shock protein HSP 90-alpha                                               | 1.00 | 1.16 | 1.08 |
| Small nuclear ribonucleoprotein Sm D1                                         | 1.00 | 1.15 | 1.08 |
| Transketolase                                                                 | 1.00 | 1.11 | 1.05 |
| Heat shock 70 kDa protein 4                                                   | 1.00 | 1.10 | 1.05 |
| PREDICTED: similar to electron transferring flavoprotein, beta polypeptide    | 1.00 | 1.08 | 1.04 |
| WD repeat domain 1 (Fragment)                                                 | 1.00 | 1.08 | 1.04 |
| Galectin-1                                                                    | 1.00 | 1.06 | 1.03 |
| Rho GDP-dissociation inhibitor 1                                              | 1.00 | 1.06 | 1.03 |
| Prohibitin                                                                    | 1.00 | 1.01 | 1.01 |
| Cation-dependent mannose-6-phosphate receptor precursor                       | 1.00 | 1.00 | 1.00 |
| Osteoclast-like cell cDNA, RIKEN full-length enriched library, clone:I420031M | 1.00 | 0.99 | 0.99 |
| PREDICTED: similar to H2A histone family, member V isoform 1                  | 1.00 | 0.98 | 0.99 |
| Isoform 2 of Rab GDP dissociation inhibitor beta                              | 1.00 | 0.94 | 0.97 |
| Actin-related protein 2/3 complex subunit 5                                   | 1.00 | 0.92 | 0.96 |
| Eukaryotic translation initiation factor 5A-1                                 | 1.00 | 0.87 | 0.93 |

|                                                                                  |      |      |      |
|----------------------------------------------------------------------------------|------|------|------|
| Thymosin beta-10                                                                 | 1.00 | 0.83 | 0.91 |
| Ras-related C3 botulinum toxin substrate 2 precursor                             | 1.00 | 0.55 | 0.77 |
| Isoform 1 of Pre-mRNA-processing factor 19                                       | 1.00 | 0.82 | 0.91 |
| Serine-threonine kinase receptor-associated protein                              | 1.01 | 1.30 | 1.15 |
| PREDICTED: similar to ribosomal protein L31                                      | 1.01 | 1.25 | 1.13 |
| Actin-like protein 3                                                             | 1.01 | 1.16 | 1.08 |
| 48 kDa protein                                                                   | 1.01 | 1.13 | 1.07 |
| Isoform Mt-VDAC1 of Voltage-dependent anion-selective channel protein 1          | 1.01 | 1.04 | 1.02 |
| Proteasome activator complex subunit 1                                           | 1.01 | 1.03 | 1.02 |
| Histone H1.2                                                                     | 1.01 | 1.00 | 1.00 |
| Isoform 5 of Mitochondrial inner membrane protein                                | 1.01 | 0.94 | 0.97 |
| Activated spleen cDNA, RIKEN full-length enriched library, clone:F830010AC       | 1.01 | 0.94 | 0.97 |
| AHNAK nucleoprotein isoform 1                                                    | 1.01 | 0.87 | 0.94 |
| 33 kDa protein                                                                   | 1.01 | 0.99 | 1.00 |
| 5-aminoimidazole-4-carboxamide ribonucleotide formyltransferase/IMP cyclase      | 1.01 | 0.97 | 0.99 |
| Isoform 1 of Heterogeneous nuclear ribonucleoprotein Q                           | 1.01 | 0.97 | 0.99 |
| 40S ribosomal protein S23                                                        | 1.01 | 1.26 | 1.13 |
| GTP-binding nuclear protein Ran                                                  | 1.01 | 1.19 | 1.10 |
| T-complex protein 1 subunit gamma                                                | 1.01 | 1.14 | 1.07 |
| Spliceosome RNA helicase Bat1                                                    | 1.01 | 1.10 | 1.05 |
| Isoform 1 of Reticulon-4                                                         | 1.01 | 1.07 | 1.04 |
| T-complex protein 1 subunit epsilon                                              | 1.01 | 1.05 | 1.03 |
| Calnexin precursor                                                               | 1.01 | 1.02 | 1.01 |
| 14 kDa protein                                                                   | 1.01 | 1.00 | 1.00 |
| Microtubule-associated protein RP/EB family member 1                             | 1.01 | 0.95 | 0.98 |
| Clathrin, heavy polypeptide                                                      | 1.01 | 0.94 | 0.97 |
| Glyceraldehyde-3-phosphate dehydrogenase                                         | 1.01 | 0.89 | 0.95 |
| 11 kDa protein                                                                   | 1.01 | 1.65 | 1.33 |
| heterogeneous nuclear ribonucleoprotein M                                        | 1.01 | 1.08 | 1.05 |
| Coactosin-like protein                                                           | 1.02 | 1.22 | 1.12 |
| 36 kDa protein                                                                   | 1.02 | 1.16 | 1.09 |
| Isoform A of Lamin-A/C                                                           | 1.02 | 1.08 | 1.05 |
| Coronin-1A                                                                       | 1.02 | 1.04 | 1.03 |
| Isoform 1 of Isocitrate dehydrogenase [NAD] subunit alpha, mitochondrial protein | 1.02 | 0.96 | 0.99 |
| Histone H1.4                                                                     | 1.02 | 1.10 | 1.06 |
| Importin-7                                                                       | 1.02 | 0.88 | 0.95 |
| 6-phosphogluconolactonase                                                        | 1.02 | 1.65 | 1.33 |
| heterogeneous nuclear ribonucleoprotein F                                        | 1.02 | 1.35 | 1.19 |
| 40S ribosomal protein S28                                                        | 1.02 | 1.19 | 1.11 |
| Peroxisome oxidoreductin-2                                                       | 1.02 | 1.15 | 1.09 |
| Prolyl endopeptidase                                                             | 1.02 | 1.15 | 1.08 |
| Bone marrow macrophage cDNA, RIKEN full-length enriched library, clone:IK        | 1.02 | 1.13 | 1.07 |
| Isoform 2 of Heterogeneous nuclear ribonucleoprotein K                           | 1.02 | 1.12 | 1.07 |
| PREDICTED: similar to 60S acidic ribosomal protein P0                            | 1.02 | 1.11 | 1.06 |
| Isoform SERCA2A of Sarcoplasmic/endoplasmic reticulum calcium ATPase             | 1.02 | 1.06 | 1.04 |
| Polypyrimidine tract-binding protein 1                                           | 1.02 | 1.03 | 1.03 |
| T-complex protein 1 subunit theta                                                | 1.02 | 1.02 | 1.02 |

|                                                                              |      |      |      |
|------------------------------------------------------------------------------|------|------|------|
| Actin-like protein 2                                                         | 1.02 | 1.01 | 1.02 |
| Splicing factor, proline- and glutamine-rich                                 | 1.02 | 0.98 | 1.00 |
| Blastocyst blastocyst cDNA, RIKEN full-length enriched library, clone:l1C001 | 1.02 | 0.97 | 1.00 |
| Dynein heavy chain, cytosolic                                                | 1.02 | 0.97 | 0.99 |
| Isoform 2 of Gelsolin precursor                                              | 1.02 | 0.90 | 0.96 |
| Anp32b protein                                                               | 1.02 | 0.87 | 0.94 |
| NOD-derived CD11c +ve dendritic cells cDNA, RIKEN full-length enriched lit   | 1.02 | 0.86 | 0.94 |
| Adult male medulla oblongata cDNA, RIKEN full-length enriched library, clon  | 1.02 | 0.83 | 0.93 |
| B6-derived CD11 +ve dendritic cells cDNA, RIKEN full-length enriched librar  | 1.02 | 0.74 | 0.88 |
| 12 days embryo spinal cord cDNA, RIKEN full-length enriched library, clone:  | 1.02 | 0.91 | 0.97 |
| 60S ribosomal protein L23                                                    | 1.03 | 1.30 | 1.16 |
| Copper transport protein ATOX1                                               | 1.03 | 1.27 | 1.15 |
| Isoform 3 of Plasminogen activator inhibitor 1 RNA-binding protein           | 1.03 | 1.11 | 1.07 |
| Alpha-actinin-4                                                              | 1.03 | 1.06 | 1.04 |
| SHYC                                                                         | 1.03 | 0.97 | 1.00 |
| Pyruvate kinase isozyme M2                                                   | 1.03 | 0.93 | 0.98 |
| Rho GDP-dissociation inhibitor 2                                             | 1.03 | 0.83 | 0.93 |
| Apoptosis-associated speck-like protein containing a CARD                    | 1.03 | 0.81 | 0.92 |
| Actin-related protein 2/3 complex subunit 2                                  | 1.03 | 1.00 | 1.01 |
| PREDICTED: similar to Bifunctional aminoacyl-tRNA synthetase                 | 1.03 | 1.03 | 1.03 |
| Nuclear mitotic apparatus protein 1                                          | 1.03 | 1.54 | 1.29 |
| Adult male adrenal gland cDNA, RIKEN full-length enriched library, clone:B3  | 1.03 | 1.34 | 1.18 |
| Peptidyl-prolyl cis-trans isomerase A                                        | 1.03 | 1.19 | 1.11 |
| T-complex protein 1 subunit delta                                            | 1.03 | 1.13 | 1.08 |
| 26S proteasome non-ATPase regulatory subunit 11                              | 1.03 | 1.11 | 1.07 |
| Poly(rC)-binding protein 1                                                   | 1.03 | 1.09 | 1.06 |
| T-complex protein 1 subunit zeta                                             | 1.03 | 1.06 | 1.04 |
| Heat shock protein HSP 90-beta                                               | 1.03 | 1.05 | 1.04 |
| 20 kDa protein                                                               | 1.03 | 1.04 | 1.03 |
| Isoform 1 of Neutral alpha-glucosidase AB precursor                          | 1.03 | 1.03 | 1.03 |
| Plastin-2                                                                    | 1.03 | 1.00 | 1.02 |
| Sulfated glycoprotein 1 precursor                                            | 1.03 | 0.98 | 1.01 |
| Flavin reductase                                                             | 1.03 | 0.96 | 0.99 |
| Hematopoietic lineage cell-specific protein                                  | 1.03 | 0.95 | 0.99 |
| Adult male tongue cDNA, RIKEN full-length enriched library, clone:2310021f   | 1.03 | 1.61 | 1.32 |
| Phosphoserine aminotransferase                                               | 1.04 | 1.27 | 1.15 |
| Glycyl-tRNA synthetase                                                       | 1.04 | 1.03 | 1.03 |
| Aminopeptidase B                                                             | 1.04 | 1.03 | 1.03 |
| 6 days neonate spleen cDNA, RIKEN full-length enriched library, clone:F420   | 1.04 | 0.99 | 1.01 |
| 17 days embryo kidney cDNA, RIKEN full-length enriched library, clone:I920   | 1.04 | 0.98 | 1.01 |
| PREDICTED: similar to Cofilin-1 (Cofilin, non-muscle isoform) isoform 1      | 1.04 | 0.97 | 1.00 |
| T-complex protein 1 subunit eta                                              | 1.04 | 0.95 | 0.99 |
| Glucose-6-phosphate isomerase                                                | 1.04 | 0.91 | 0.97 |
| Nucleosome assembly protein 1-like 1                                         | 1.04 | 0.98 | 1.01 |
| karyopherin (importin) beta 1                                                | 1.04 | 0.92 | 0.98 |
| Bone marrow macrophage cDNA, RIKEN full-length enriched library, clone:l     | 1.04 | 1.47 | 1.25 |
| 23 kDa protein                                                               | 1.04 | 1.26 | 1.15 |

|                                                                             |      |      |      |
|-----------------------------------------------------------------------------|------|------|------|
| C-1-tetrahydrofolate synthase, cytoplasmic                                  | 1.04 | 1.24 | 1.14 |
| Serine/threonine-protein phosphatase PP1-alpha catalytic subunit            | 1.04 | 1.22 | 1.13 |
| Isoform 3 of Protein arginine N-methyltransferase 1                         | 1.04 | 1.13 | 1.08 |
| Cytosolic nonspecific dipeptidase                                           | 1.04 | 1.00 | 1.02 |
| Proliferation-associated protein 2G4                                        | 1.04 | 0.98 | 1.01 |
| Hsp90 co-chaperone Cdc37                                                    | 1.04 | 0.92 | 0.98 |
| Actin, cytoplasmic 1                                                        | 1.04 | 0.89 | 0.97 |
| Long-chain specific acyl-CoA dehydrogenase, mitochondrial precursor         | 1.04 | 0.77 | 0.91 |
| PREDICTED: similar to transmembrane trafficking protein                     | 1.04 | 0.75 | 0.90 |
| PRA1 family protein 3                                                       | 1.04 | 0.74 | 0.89 |
| Malate dehydrogenase, cytoplasmic                                           | 1.05 | 1.60 | 1.32 |
| 17beta-hydroxysteroid dehydrogenase type 10/short chain L-3- hydroxyacyl-   | 1.05 | 1.23 | 1.14 |
| Cathepsin D precursor                                                       | 1.05 | 1.14 | 1.09 |
| Profilin-1                                                                  | 1.05 | 1.10 | 1.07 |
| Isoform 2 of Cell division control protein 42 homolog precursor             | 1.05 | 1.08 | 1.06 |
| Creatine kinase B-type                                                      | 1.05 | 1.07 | 1.06 |
| Moesin                                                                      | 1.05 | 1.03 | 1.04 |
| Peroxiredoxin 6                                                             | 1.05 | 0.99 | 1.02 |
| phosphoglycerate kinase 1                                                   | 1.05 | 0.90 | 0.97 |
| 2 days neonate thymus thymic cells cDNA, RIKEN full-length enriched library | 1.05 | 0.85 | 0.95 |
| 10 days embryo whole body cDNA, RIKEN full-length enriched library, clone:  | 1.05 | 0.87 | 0.96 |
| Eukaryotic translation initiation factor 2 subunit 1                        | 1.05 | 1.43 | 1.24 |
| PREDICTED: similar to 6-phosphogluconate dehydrogenase, decarboxylatin      | 1.05 | 1.29 | 1.17 |
| Ras GTPase-activating-like protein IQGAP1                                   | 1.05 | 1.20 | 1.12 |
| Activated spleen cDNA, RIKEN full-length enriched library, clone:F830225J0  | 1.05 | 1.11 | 1.08 |
| T-complex protein 1 subunit alpha A                                         | 1.05 | 1.06 | 1.06 |
| Tropomyosin alpha-4 chain                                                   | 1.05 | 0.97 | 1.01 |
| Isoform 1 of Tyrosine-protein phosphatase non-receptor type 6               | 1.05 | 0.96 | 1.00 |
| NOD-derived CD11c +ve dendritic cells cDNA, RIKEN full-length enriched lit  | 1.05 | 0.89 | 0.97 |
| Triosephosphate isomerase                                                   | 1.05 | 0.83 | 0.94 |
| Ras-related protein Rab-5A                                                  | 1.05 | 1.41 | 1.23 |
| 2 days neonate thymus thymic cells cDNA, RIKEN full-length enriched library | 1.05 | 0.59 | 0.82 |
| T-complex protein 1 subunit beta                                            | 1.05 | 0.94 | 1.00 |
| NOD-derived CD11c +ve dendritic cells cDNA, RIKEN full-length enriched lit  | 1.06 | 1.25 | 1.15 |
| tripeptidyl peptidase II                                                    | 1.06 | 1.18 | 1.12 |
| 26S proteasome non-ATPase regulatory subunit 2                              | 1.06 | 1.14 | 1.10 |
| 15 days pregnant adult female amnion cDNA, RIKEN full-length enriched libr  | 1.06 | 0.96 | 1.01 |
| PREDICTED: similar to transgelin 2                                          | 1.06 | 0.95 | 1.00 |
| Fructose-bisphosphate aldolase A                                            | 1.06 | 0.86 | 0.96 |
| Alanyl-tRNA synthetase, cytoplasmic                                         | 1.06 | 0.74 | 0.90 |
| CRL-1722 L5178Y-R cDNA, RIKEN full-length enriched library, clone:l73004    | 1.06 | 1.18 | 1.12 |
| Bone marrow macrophage cDNA, RIKEN full-length enriched library, clone:l    | 1.06 | 0.99 | 1.02 |
| 12 kDa protein                                                              | 1.06 | 0.89 | 0.98 |
| Voltage-dependent anion channel 2                                           | 1.06 | 1.27 | 1.17 |
| Tubulin alpha-6 chain                                                       | 1.06 | 1.24 | 1.15 |
| 60S ribosomal protein L22                                                   | 1.06 | 1.21 | 1.13 |
| Ras-related protein Rab-10                                                  | 1.06 | 1.20 | 1.13 |



|                                                                            |      |      |      |
|----------------------------------------------------------------------------|------|------|------|
| Ras-related protein Rab-7                                                  | 1.06 | 1.04 | 1.05 |
| 13 days embryo lung cDNA, RIKEN full-length enriched library, clone:D4300. | 1.06 | 1.01 | 1.03 |
| TAR DNA-binding protein 43                                                 | 1.06 | 0.97 | 1.01 |
| Vimentin                                                                   | 1.06 | 0.92 | 0.99 |
| F-actin capping protein alpha-2 subunit                                    | 1.06 | 0.92 | 0.99 |
| Transforming protein RhoA precursor                                        | 1.06 | 0.91 | 0.98 |
| PREDICTED: similar to RAS related protein 1b                               | 1.06 | 0.89 | 0.97 |
| PREDICTED: similar to Glutamate dehydrogenase 1, mitochondrial precursor   | 1.06 | 1.39 | 1.22 |
| Proteasome subunit alpha type 1                                            | 1.06 | 1.04 | 1.05 |
| Ribonuclease inhibitor                                                     | 1.07 | 1.67 | 1.37 |
| Glycine amidinotransferase, mitochondrial precursor                        | 1.07 | 1.47 | 1.27 |
| Adult male testis cDNA, RIKEN full-length enriched library, clone:4930525G | 1.07 | 1.14 | 1.10 |
| Isoform 6 of Phosphatidylinositol-binding clathrin assembly protein        | 1.07 | 1.10 | 1.08 |
| Dodecenoyl-Coenzyme A delta isomerase                                      | 1.07 | 0.96 | 1.01 |
| Annexin A2                                                                 | 1.07 | 0.87 | 0.97 |
| Brain CRL-1443 BC3H1 cDNA, RIKEN full-length enriched library, clone:G43   | 1.07 | 1.19 | 1.13 |
| Biliverdin reductase A precursor                                           | 1.07 | 1.34 | 1.20 |
| ATP synthase subunit alpha, mitochondrial precursor                        | 1.07 | 1.14 | 1.10 |
| Talin-1                                                                    | 1.07 | 1.12 | 1.10 |
| Isoform Cytoplasmic of Fumarate hydratase, mitochondrial precursor         | 1.07 | 1.02 | 1.04 |
| Peroxiredoxin-1                                                            | 1.07 | 0.91 | 0.99 |
| Vav1 protein                                                               | 1.07 | 1.30 | 1.19 |
| Farnesyl pyrophosphate synthetase                                          | 1.08 | 1.51 | 1.29 |
| Dolichyl-diphosphooligosaccharide--protein glycosyltransferase 67 kDa subu | 1.08 | 1.44 | 1.26 |
| CD44 antigen isoform a                                                     | 1.08 | 1.22 | 1.15 |
| P67phox                                                                    | 1.08 | 1.12 | 1.10 |
| Ubiquitin-activating enzyme E1 1                                           | 1.08 | 0.94 | 1.01 |
| Isoform Short of 14-3-3 protein beta/alpha                                 | 1.08 | 0.88 | 0.98 |
| Acidic leucine-rich nuclear phosphoprotein 32 family member A              | 1.08 | 1.14 | 1.11 |
| 8 days embryo whole body cDNA, RIKEN full-length enriched library, clone:5 | 1.08 | 1.13 | 1.11 |
| eukaryotic translation initiation factor 4, gamma 1 isoform b              | 1.08 | 0.89 | 0.99 |
| Pre-mRNA-processing-splicing factor 8                                      | 1.08 | 0.86 | 0.97 |
| 34 kDa protein                                                             | 1.08 | 0.84 | 0.96 |
| Thioredoxin                                                                | 1.09 | 1.13 | 1.11 |
| Alpha-enolase                                                              | 1.09 | 1.08 | 1.08 |
| Tripartite motif protein 28                                                | 1.09 | 1.25 | 1.17 |
| Adenine phosphoribosyl transferase                                         | 1.09 | 1.22 | 1.16 |
| ES cells cDNA, RIKEN full-length enriched library, clone:C330018O14 produ  | 1.09 | 1.21 | 1.15 |
| vesicle-associated membrane protein, associated protein A                  | 1.09 | 1.09 | 1.09 |
| Macrophage migration inhibitory factor                                     | 1.09 | 0.88 | 0.99 |
| Serine/threonine-protein phosphatase 2A 65 kDa regulatory subunit A alpha  | 1.10 | 1.41 | 1.25 |
| Small nuclear ribonucleoprotein E                                          | 1.10 | 1.09 | 1.09 |
| Loss of heterozygosity 11 chromosomal region 2 gene A protein homolog      | 1.10 | 1.04 | 1.07 |
| Myotrophin                                                                 | 1.10 | 1.02 | 1.06 |
| Arginyl-tRNA synthetase, cytoplasmic                                       | 1.10 | 0.99 | 1.04 |
| Ras-related protein Rab-14                                                 | 1.10 | 0.92 | 1.01 |
| tumor protein D52 isoform 1                                                | 1.10 | 1.30 | 1.20 |

|                                                                                        |      |      |      |
|----------------------------------------------------------------------------------------|------|------|------|
| 69 kDa protein                                                                         | 1.10 | 1.38 | 1.24 |
| Matrin-3                                                                               | 1.10 | 1.28 | 1.19 |
| nestin                                                                                 | 1.10 | 0.98 | 1.04 |
| Aspartate aminotransferase, cytoplasmic                                                | 1.10 | 0.98 | 1.04 |
| 12 days embryo spinal ganglion cDNA, RIKEN full-length enriched library, clone         | 1.10 | 0.96 | 1.03 |
| Phosphoglycerate mutase 1                                                              | 1.10 | 0.87 | 0.98 |
| Hepatoma-derived growth factor                                                         | 1.10 | 0.73 | 0.91 |
| PREDICTED: similar to Annexin A3 (Annexin III) (Lipocortin III) (Placental annexin A3) | 1.11 | 1.06 | 1.08 |
| Isoform 1 of NSFL1 cofactor p47                                                        | 1.11 | 0.71 | 0.91 |
| MARCKS-related protein                                                                 | 1.11 | 1.50 | 1.30 |
| Thioredoxin-like protein 2                                                             | 1.11 | 1.22 | 1.16 |
| Seryl-tRNA synthetase, cytoplasmic                                                     | 1.11 | 0.88 | 1.00 |
| PREDICTED: similar to aldo-keto reductase family 1, member A4                          | 1.11 | 0.93 | 1.02 |
| Annexin A5                                                                             | 1.12 | 1.15 | 1.13 |
| Histone H1.3                                                                           | 1.12 | 1.11 | 1.11 |
| Isoform 2 of Heterogeneous nuclear ribonucleoprotein Q                                 | 1.12 | 0.76 | 0.94 |
| eukaryotic translation initiation factor 3 subunit 6 interacting protein               | 1.12 | 1.39 | 1.25 |
| 14-3-3 protein epsilon                                                                 | 1.12 | 1.00 | 1.06 |
| Rho-related GTP-binding protein RhoG precursor                                         | 1.12 | 0.80 | 0.96 |
| Ras-related protein Rab-1A                                                             | 1.13 | 1.01 | 1.07 |
| Annexin A1                                                                             | 1.13 | 0.92 | 1.02 |
| 69 kDa protein                                                                         | 1.13 | 0.84 | 0.98 |
| RuvB-like 1                                                                            | 1.16 | 1.21 | 1.18 |
| Vacuolar protein sorting-associated protein 35                                         | 1.16 | 0.91 | 1.03 |
| PREDICTED: similar to nuclease sensitive element binding protein 1                     | 1.16 | 0.90 | 1.03 |
| Chloride intracellular channel protein 4                                               | 1.17 | 0.91 | 1.04 |
| Abhydrolase domain-containing protein 12                                               | 1.17 | 0.76 | 0.96 |
| oxysterol-binding protein-like protein 8 isoform a                                     | 1.17 | 0.71 | 0.94 |
| Isoform 1 of 6-phosphofructokinase type C                                              | 1.17 | 1.06 | 1.11 |
| 14-3-3 protein gamma                                                                   | 1.18 | 1.04 | 1.11 |
| AM2 receptor                                                                           | 1.19 | 1.04 | 1.12 |
| Chloride intracellular channel protein 1                                               | 1.19 | 0.81 | 1.00 |
| Adult male medulla oblongata cDNA, RIKEN full-length enriched library, clone           | 1.20 | 0.90 | 1.05 |
| Hexokinase-2                                                                           | 1.21 | 1.68 | 1.44 |
| Monocyte differentiation antigen CD14 precursor                                        | 1.22 | 1.45 | 1.33 |
| Vacuolar ATP synthase subunit H                                                        | 1.23 | 1.40 | 1.31 |
| Glutaredoxin-1                                                                         | 1.23 | 1.83 | 1.53 |
| Splicing factor 3B subunit 1                                                           | 1.23 | 0.90 | 1.07 |
| vasodilator-stimulated phosphoprotein                                                  | 1.24 | 1.34 | 1.29 |
| Brain acid soluble protein 1                                                           | 1.26 | 1.49 | 1.37 |
| S-formylglutathione hydrolase                                                          | 1.28 | 1.12 | 1.20 |
| TAP binding protein isoform 1                                                          | 1.39 | 0.83 | 1.11 |
| Isoform 3 of Cellular nucleic acid-binding protein                                     | 1.50 | 0.83 | 1.17 |
| Eukaryotic translation initiation factor 2 subunit 2                                   | 1.53 | 0.97 | 1.25 |
