# Supplementary material
Source: PubMed Central journal article supplement (PMC2655317)
Supplement: NIHMS91480-supplement-3_si_003.pdf [file NIHMS91480-supplement-3_si_003.pdf]

## SILAC-1

## SILAC-2

## iTRAQ-1

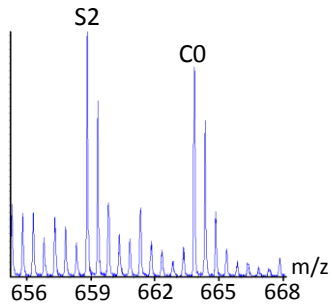

Sequence LQIWDTAGQER

R(S2:C0) 1.16

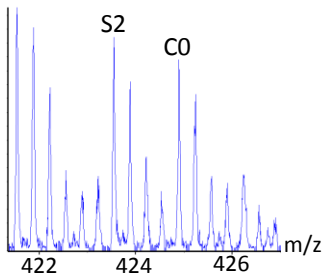

Sequence SCLLHQFTEK

R(S2:C0) 1.25

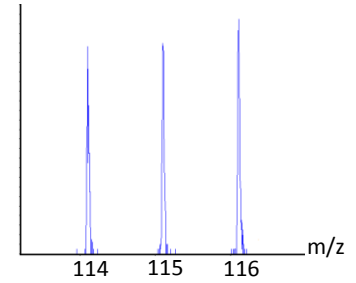

Sequence TGENVEDAFLEA

R(116:114) 1.11

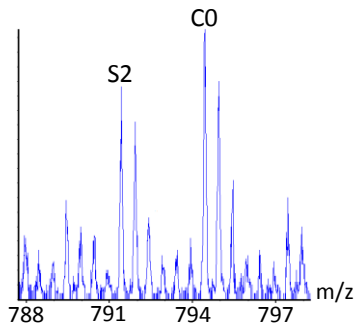

Sequence FADSLGVPFLETSAK

R(S2:C0) 0.78

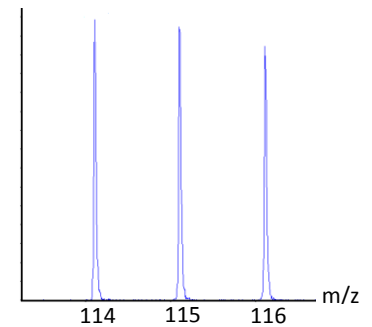

Sequence MGPGAASGGERP NLK

R(116:114) 0.85

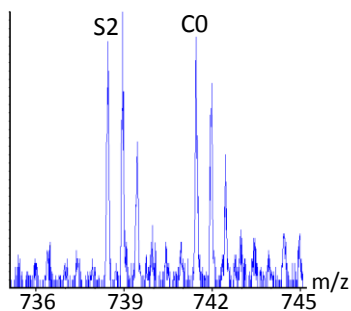

Sequence DPENFPFVVLGNK

R(S2:C0) 1.08

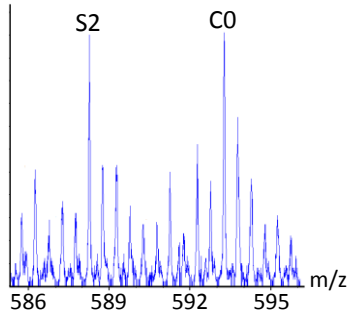

Sequence DEFLIQASPR

R(S2:C0) 1.03

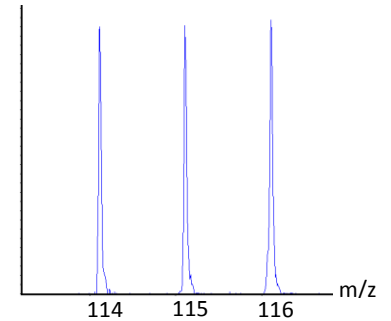

Sequence DPENFPFVVLGNK

R(116:114) 1.04

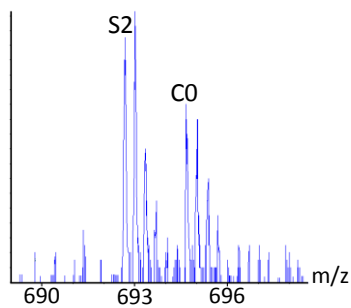

Sequence AGEASAESTGAADGAAPEEGEAK

R(S2:C0) 1.42

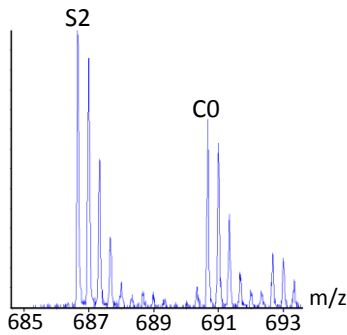

Sequence SDAAPAASDSKPSSAEPAPSSK

R(S2:C0) 1.64

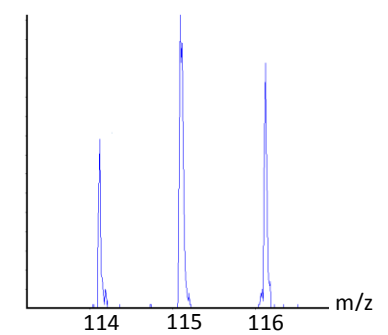

Sequence APAPAAPAAAEPQAEAPAAAASSEQSVAVKE

R(116:114) 1.40
